# Supplementary material for: Sporadic SARS-CoV-2 cases at the neighbourhood level in Toronto, Ontario, 2020: a spatial analysis of the early pandemic period
Source: PubMed Central journal article supplement — CMAJ Open. 2022 Mar 8;10(1):E190–5. doi: 10.9778/cmajo.20210249 (PMC9259452; doi:10.9778/cmajo.20210249), 2022-03-08
Supplement: 2021-0249-1-at.pdf [file 2021-0249-1-at.pdf]

**Appendix to Sporadic SARS-CoV-2 cases at the neighbourhood level in Toronto, Ontario, 2020: a spatial analysis of the early pandemic period**

Table A1: Summary statistics of Toronto neighbourhood characteristics.

|                                              | <b>Median</b> | <b>Range</b>  |
|----------------------------------------------|---------------|---------------|
| <b>Case Count</b>                            | 137           | 27–1,115      |
| <b>Population</b>                            | 16,750        | 6,577–65,913  |
| <b>Raw Rate per 100,000</b>                  | 819           | 255–3,384     |
| <b>Smoothed Rate per 100,000</b>             | 824           | 264–3,368     |
| <b>Average Household Size</b>                | 2.525         | 1.540–3.44    |
| <b>LIM-AT</b>                                | 18.55         | 4.50–45.50    |
| <b>Dependency Ratio</b>                      | 0.4683        | 0.1291–0.6980 |
| <b>Population density per km<sup>2</sup></b> | 5,072         | 1,040–44,321  |
