# Supplementary material for: Sporadic SARS-CoV-2 cases at the neighbourhood level in Toronto, Ontario, 2020: a spatial analysis of the early pandemic period
Source: PubMed Central journal article supplement — CMAJ Open. 2022 Mar 8;10(1):E190–5. doi: 10.9778/cmajo.20210249 (PMC9259452; doi:10.9778/cmajo.20210249), 2022-03-08
Supplement: open-2021-0249-original-submission.pdf [file open-2021-0249-original-submission.pdf]

1  
2  
3 1 Spatial analysis of sporadic COVID-19 cases at the neighbourhood-level in  
4 Toronto, Ontario, 2020.  
5  
6

7 3  
8  
9 4 Lindsay Obress<sup>1</sup>, Olaf Berke PhD<sup>1</sup>, David N. Fisman, MD MPH<sup>2</sup>, Ashleigh R. Tuite, PhD  
10 MPH<sup>2</sup>, and Amy L. Greer, PhD<sup>1, 2</sup>  
11  
12 6

13  
14 7 <sup>1</sup> Department of Population Medicine, University of Guelph

15  
16 8 <sup>2</sup> Dalla Lana School of Public Health, University of Toronto  
17  
18 9

19  
20 10 **Corresponding Author:** Amy L. Greer, PhD. Department of Population Medicine,  
21 University of Guelph. 50 Stone Rd E, Guelph, ON N1G 2W1. Email:  
22 agreer@uoguelph.ca  
23  
24 13

25  
26 14 **Funding:** This research did not receive any specific grant from funding agencies in the  
27 public, commercial, or not-for-profit sectors.  
28  
29 16  
30  
31 17  
32  
33 18  
34  
35  
36  
37  
38  
39  
40  
41  
42  
43  
44  
45  
46  
47  
48  
49  
50  
51  
52  
53  
54  
55  
56  
57  
58  
59  
60

1  
2  
3 19 **Abstract**  
4

5 20 **Background:** As the largest city in Canada, Toronto has played an important role in the  
6  
7 21 dynamics of COVID-19 transmission in Ontario. The burden of disease across Toronto  
8  
9 22 neighbourhoods has shown significant heterogeneity. This study investigates spatial  
10  
11 23 variation of sporadic COVID-19 cases in Toronto, Ontario and whether risk factors  
12  
13 24 associated with socioeconomic status are related to the spatial variation.  
14  
15  
16

17 25 **Methods:** A flexibly shaped spatial scan was used to detect clusters of increased risk of  
18  
19 26 sporadic COVID-19 risk. Then, a generalized linear geostatistical model was used to  
20  
21 27 investigate if average household size, population density, dependency ratio, and  
22  
23 28 prevalence of low-income households were associated with sporadic COVID-19 rates.  
24  
25  
26

27 29 **Results:** Three clusters of elevated COVID-19 risk were identified with standardized  
28  
29 30 morbidity ratios ranging from 1.59–2.43. The generalized linear geostatistical model  
30  
31 31 found that average household size (RR = 2.17, 95% CI: 1.80–2.61,  $p < 0.01$ ) and  
32  
33 32 percentage of low-income households (RR = 1.03, 95% CI: 1.02–1.04,  $p < 0.01$ ) were  
34  
35 33 significant predictors of sporadic COVID-19 cases at the neighbourhood-level.  
36  
37  
38

39 34 **Interpretation:** Socioeconomic status is a well-established predictor of disease burden  
40  
41 35 and may explain the spatial variation in sporadic COVID-19 cases across the Toronto  
42  
43 36 neighbourhoods. Public policy that addresses the challenges faced by individuals in  
44  
45 37 these communities are critical to curb the epidemic in Toronto and Canada as a whole.  
46  
47  
48

49 38  
50

51 39  
52

53  
54 40  
55  
56  
57  
58  
59  
60

## 41 Introduction

42 The first case of coronavirus disease 2019 (COVID-19) in Canada was reported on  
43 January 25<sup>th</sup>, 2020 after an individual returned to Toronto, Ontario from Wuhan, China  
44 (1). As the pandemic continued, Toronto has remained a focal area within Canada as the  
45 largest major city and home of Canada's busiest airport. As of November 26<sup>th</sup>, 2020, there  
46 have been 39,914 cases of COVID-19 reported in Toronto with a cumulative incidence of  
47 1220.3 cases per 100,000 population (2,3). At that time, the cumulative incidence in the  
48 province of Ontario was 748.2 cases per 100,000 population (4). The risk and costs of a  
49 pandemic are not equal for all citizens. Individuals with low socioeconomic status  
50 disproportionally shoulder the burden of disease in any society, and this is amplified  
51 during a global health crisis (5). Lower socioeconomic status is associated with  
52 comorbidities linked to more severe COVID-19 disease and also with the conduct of  
53 essential work that cannot be done from home, such that these workers have continued  
54 to engage in in-person work throughout the pandemic (5,6). The spatial distribution of  
55 disease can provide insight into the observed differences in disease rates across a city  
56 by examining underlying social determinants of health and their relation to neighbourhood  
57 infection rates.

58 Toronto is subdivided into 140 neighbourhoods and the burden of COVID-19 has  
59 been observed to vary widely across the city (2). The goal of this study was to (i)  
60 determine if there are clusters of increased risk of sporadic COVID-19 at the  
61 neighbourhood-level, (ii) determine if there is spatial clustering in sporadic COVID-19  
62 rates in Toronto, and (iii) create a generalized linear geostatistical model to investigate  
63 the effect of various risk factors on sporadic COVID-19 rates across Toronto.

## 64 **Methods**

### 65 *Data sources*

66 The COVID-19 case data was retrieved from the city of Toronto COVID-19  
67 dashboard for cases reported between January 25<sup>th</sup>, 2020 – November 26<sup>th</sup>, 2020 (2). A  
68 case is defined as a confirmed or probable case of COVID-19 reported to Toronto  
69 Public Health through the Public Health Case and Contact Management Solution (CCM)  
70 (7). To explore the dynamics of spread at the community level, *sporadic* cases were  
71 selected, and outbreak related cases were excluded. The definition of sporadic cases is  
72 “*all cases not linked to an outbreak in general members of the population*” (7). The  
73 neighbourhood profiles and geographic boundary files were retrieved from Toronto  
74 Open Data (8,9). Case data and neighbourhood profiles, and geographical data files  
75 were linked by neighbourhood ID numbers. Population, average household size,  
76 population density, low-income measure – after tax (LIM-AT), percentage visible  
77 minority, and population size broken down by age group were selected from the 2016  
78 Toronto Neighbourhood Profile as variables of interest (8). The variables of interest  
79 were selected as they are a subset of variables used to construct the Ontario  
80 Marginalization index, a widely used index that encompasses various factors of  
81 marginalization and socioeconomic status, however it is not available at the  
82 neighbourhood level (10). Population by age group was used to create a dependency  
83 ratio calculated as the ratio of children (<15 years old) and seniors (≥ 65 years old) to  
84 the population aged 15–64 for each neighbourhood (10).

85

## 86 *Disease Mapping*

87           The incidence rate of sporadic cases of COVID-19 reported from January 25<sup>th</sup>,  
88 2020 to November 26<sup>th</sup>, 2020 in Toronto was mapped at the neighbourhood-level.  
89 Neighbourhood population size was used as the denominator to calculate the incidence  
90 rate for each neighbourhood. To account for varying population sizes across  
91 neighbourhoods, empirical Bayesian smoothed rates were estimated and their spatial  
92 distribution pattern was visualized by choropleth mapping (11). The UTM 17N projection  
93 was applied to minimize distortion of maps.

## 95 *Disease cluster detection*

96           A flexibly spatial scan test was used to determine the locations of probable  
97 geographic clusters of elevated sporadic COVID-19 rates and estimate the standardized  
98 morbidity ratio (SMR) within identified clusters (12). The flexibly spatial scan test was  
99 selected as it allows for irregularly shaped clusters to be detected that would not be  
100 picked up by more traditional methods (i.e., circular scanning window). The spatial scan  
101 test identifies clusters by gradually scanning each neighbourhood and increasing the  
102 scanning window to a maximum cluster size. The window that attains the maximum  
103 likelihood is identified as the primary, most likely, cluster. Additional clusters may then  
104 be identified. The maximum number of regions in a cluster was set to 14 as this  
105 represented 10% of neighbourhoods and the respective population would be still below  
106 the maximum size of 50% of total population for a single disease cluster. Identifying  
107 small clusters are preferred for public health studies to allow for intervention to be

1  
2  
3 108 applied more easily, and clusters larger than 10-15% of the total regions are unlikely  
4  
5 109 (12). P-values to determine significance of the spatial scan test were estimated using  
6  
7 110 999 Monte Carlo simulations, where the null hypothesis is that the rate of cases within a  
8  
9 111 cluster does not differ from the rate outside of the cluster. The SMR was calculated by  
10  
11 112 dividing the observed cases by the expected cases calculated in the flexibly shaped  
12  
13 113 spatial scan test (12). We excluded clusters where the lower bound of the SMR 95%  
14  
15 114 confidence interval was below 1.5, as spatial scan tests are most suitable to detect  
16  
17 115 clusters with relative risk of 1.5 and above (13). Additionally, it was determined that a  
18  
19 116 SMR above 1.5 would be of public health interest. Therefore, we excluded clusters with  
20  
21 117 a SMR 95% confidence interval that was lower than 1.5.  
22  
23  
24  
25  
26  
27  
28  
29

### 30 119 *Disease clustering*

31  
32  
33 120 To determine if disease clustering (spatial dependence) was present in our data,  
34  
35 121 two-sided Moran's I correlation coefficient was calculated using the empirical Bayesian  
36  
37 122 smoothed rates, where the null hypothesis is absence of spatial correlation (14). Queen-  
38  
39 123 neighbourhood structure was used for the test, where regions that share any border  
40  
41 124 point are considered neighbours.  
42  
43  
44  
45  
46  
47

### 48 126 *Generalized linear geostatistical model*

49  
50  
51 127 To further investigate COVID-19 disease clustering in Toronto neighbourhoods, a  
52  
53 128 model was built to examine risk factors. To account for spatial autocorrelation, a  
54  
55 129 generalized linear geostatistical model (GLGM) was fit to model the effect of average  
56  
57  
58  
59  
60

1  
2  
3 130 household size, population density, LIM-AT, percentage visible minority, and  
4  
5 131 dependency ratio on the number of sporadic COVID-19 cases at the neighbourhood  
6  
7 132 level with population as the offset (15). The data is centered at the centroid of each  
8  
9  
10 133 neighbourhood and Euclidean distance was used to measure distances between  
11  
12 134 neighbourhoods. The GLGM with a spherical spatial correlation structure with a Poisson  
13  
14 135 family distribution was fit by Penalized-Quasi likelihood (PQL) estimation. The model  
15  
16  
17 136 was assessed by examining the normality assumption of the standardized residuals.  
18  
19  
20 137

## 21 22 23 138 *Analysis*

24  
25  
26 139 R 4.0.2 was used to conduct all analyses including generating choropleth maps,  
27  
28 140 flexible scan test (*smerc* package), spatial clustering tests (*spdep* package), and fitting  
29  
30 141 GLGM (*MASS* and *GeoR* packages) (16,17). A significance level of 5% was used for all  
31  
32 142 tests and confidence intervals.  
33  
34  
35  
36 143

## 37 38 39 144 **Results**

40  
41  
42 145 The dataset contained 30,598 sporadic cases of COVID-19 in Toronto across the  
43  
44 146 140 neighbourhoods. 2.3% of sporadic cases (704 cases) had missing postal codes and  
45  
46 147 were excluded from the analyses. Reported laboratory confirmed case counts within a  
47  
48 148 neighbourhood ranged from 27 to 1,115, with empirical Bayesian smoothed rates  
49  
50 149 ranging from 263.8 to 3,367.8 cases per 100,000 population, and with a median of  
51  
52  
53 150 823.5 cases per 100,000 population. Smoothed rates appear to be the highest in the  
54  
55  
56  
57  
58  
59  
60

1  
2  
3 151 north-west regions and north-east regions of the city and lowest in the southern and  
4  
5 152 central regions (Figure 1).  
6  
7

8 153 The flexible scan test identified three regions of increased sporadic COVID-19 risk  
9  
10 154 (Table 1; Figure 2). The primary cluster had the highest SMR of 2.43 (95% CI: 2.38–  
11  
12 2.49), meaning there is a 2.43 times higher risk within this cluster compared to the risk  
13  
14 155 of sporadic COVID-19 within the whole city of Toronto. The SMR of the secondary  
15  
16 156 clusters were 1.59 (95% CI: 1.53–1.66) and 1.70 (95% CI: 1.59–1.82) (Table 1).  
17  
18 157  
19

20 158 Moran's I test for clustering indicated that spatial clustering was present, indicating  
21  
22 159 there is spatial dependence in the data that must be accounted for when modelling. The  
23  
24 160 value of the Moran's I coefficient was 0.676 ( $p < 0.01$ ).  
25  
26  
27

28 161 A GLGM was fit and there was a significant effect of household size, and  
29  
30 162 percentage of low-income households (defined by LIM-AT) on risk of sporadic COVID-  
31  
32 163 19 cases. Population density, percentage visible minority, and the dependency ratio  
33  
34 164 were not significant in the model and were removed. The final GLGM, including only  
35  
36 165 average household size and percentage of low-income households, found both  
37  
38 166 variables to be significant (Table 2). Where when average household size increases by  
39  
40 167 1, the increases risk of sporadic COVID-19 case by 2.17 ( $\beta = 0.772$ , RR = 2.17,  $p$   
41  
42 <0.01), and a 1% increase in LIM-AT score increases risk of sporadic COVID-19 case  
43  
44 168 by 1.03 ( $\beta = 0.032$ , RR = 1.03,  $p < 0.01$ ) (Table 2). The range, the maximum distance  
45  
46 169 between centroids of neighbourhoods up to which spatial dependence is observed by  
47  
48 170 the model was 591 meters. The assumption of normality of residuals was found no  
49  
50 171 violations.  
51  
52  
53 172  
54  
55  
56  
57  
58  
59  
60



## 173 Interpretation

174 Three clusters of elevated risk of sporadic COVID-19 cases were found within  
175 Toronto neighbourhoods with SMRs ranging from 1.59–2.43 (Table 1; Figure 2). While  
176 Cluster 1 is identified as the *most likely* cluster through the spatial scan test, all clusters  
177 are of importance for public health considerations. These clusters can be identified as  
178 key areas to target additional COVID-19 resources towards, such as pop-up testing  
179 clinics or targeted areas for vaccination.

180 The GLGM found that average household size and LIM-AT prevalence were  
181 associated with the rate of sporadic COVID-19 at the neighbourhood level (Table 2). For  
182 average household size, when the average household size in a neighbourhood  
183 increased by 1, the risk of sporadic COVID-19 increased by a factor of 2.17.  
184 Additionally, as the percentage of households that fall within the low-income measure  
185 criteria increased by 1%, the risk of sporadic COVID-19 cases increased by a factor of  
186 1.03, at the neighbourhood level. Considering the difference between the  
187 neighbourhoods with lowest LIM-AT prevalence (4.5%) and the neighbourhoods with  
188 the highest prevalence (45.5%), there is a 3.67 times higher risk of sporadic COVID-19  
189 for individuals living in the area with the highest LIM-AT prevalence. The model also had  
190 a low value for range, 591 metres. A range this low suggests that the spatial clustering  
191 can be explained by the risk factors included in the model and the identified clusters.

192 These findings align with literature linking poorer health outcomes to decreased  
193 socioeconomic status at a local level (5). A large-scale event such as a global pandemic  
194 only widens the discrepancies between those who are more and less privileged (5).  
195 Individuals who are of higher socio-economic status often work jobs where they can

1  
2  
3 196 work from home more easily than those who are of lower socio-economic status (6).  
4  
5 197 Those of lower socio-economic status often work in fields that have been deemed  
6  
7 198 essential during a pandemic such as – healthcare, manufacturing, and retail, among  
8  
9  
10 199 others and may rely on public transit to get to their place of work (6,18). Policies are  
11  
12 200 needed to address these risk factors and use information such as this to develop  
13  
14 201 targeted strategies for vaccination. Paid sick days can prevent the spread of disease by  
15  
16  
17 202 giving working individuals the opportunity to seek medical care and isolate without lost  
18  
19 203 wages or fear of termination, which is especially important for those in essential and  
20  
21 204 low-income jobs (19–21). Additionally, providing locations, such as hotels, where  
22  
23 205 individuals can safely isolate away from their families, may provide a solution for  
24  
25  
26 206 households that do not have space for at-home isolation, decreasing within-household  
27  
28 207 spread (22,23).  
29  
30

31 208 This study is a first step into investigating the variability observed in the spatial  
32  
33 209 distribution of SARS-CoV-2 cases during a pandemic. Further studies could examine  
34  
35 210 additional factors that may better characterize socioeconomic status and  
36  
37  
38 211 marginalization. For example, using the Ontario Marginalization Index could be more  
39  
40 212 representative of marginalization and socioeconomic status and can be constructed  
41  
42  
43 213 using census information, however, that was beyond the scope of this project (10).  
44  
45 214 Individual level factors would also be of interest to examine, including occupations,  
46  
47 215 ability to work from home, risk-taking behaviours, or children attending school in-person  
48  
49  
50 216 versus online. A separate research question could examine outbreak related cases  
51  
52 217 such as in long-term care settings or school settings.  
53  
54

55 218  
56  
57  
58  
59  
60

## 219 **Limitations**

220 Various types of bias may have been encountered when analysing these data.  
221 First, we are only looking at a limited set of group-level factors and summary values.  
222 This does not often give the full picture and may miss individual variation, such as  
223 specific sex, age, race differences, and additional variables may be of interest in future  
224 studies. Another limitation of this study is that only sporadic cases were investigated  
225 which could be influenced by misclassification bias. For example, individuals who work  
226 in a health care setting that test positive may be deemed part of an outbreak when their  
227 infection was acquired sporadically in the community or vice versa. There has also been  
228 found to be variation in testing rates across regions which may also influence the  
229 number of cases being detected in neighbourhoods. Additionally, when interpreting  
230 spatial studies, it is always important to consider the modifiable areal unit problem  
231 (MAUP) that occurs when studies aggregate spatial data to regions. The level of  
232 aggregation selected, in this study the neighbourhood level, effects the interpretation of  
233 the findings, as results may vary if another level of aggregation was selected (such as  
234 census tract or dissemination area). The flexibly shaped spatial scan test has limitations  
235 including being most practical for detection of small clusters and if larger clusters  
236 wanted to be considered, alternative methods would need to be used (12). These  
237 factors must be considered in the conclusions.

238

239

240

1  
2  
3 241 **Conclusion**  
4  
5

6 242 This study found wide variation in the spatial distribution of sporadic COVID-19  
7  
8 243 incidence rates across Toronto's 140 neighbourhoods. This variation can be at least  
9  
10 244 partially explained by the risk factors that were considered in this study where residents  
11  
12 245 of areas that have higher average household size and higher prevalence of low-income  
13  
14 246 households had a higher risk of sporadic COVID-19. Policies such as paid sick days,  
15  
16 247 hotel quarantine sites, and targeted vaccination strategies, could help close the gap in  
17  
18 248 some of the inequalities identified in this study and could help prevent the spread of  
19  
20 249 COVID-19.  
21  
22  
23  
24  
25  
26  
27  
28 251  
29  
30  
31  
32  
33  
34  
35  
36  
37  
38  
39  
40  
41  
42  
43  
44  
45  
46  
47  
48  
49  
50  
51  
52  
53  
54  
55  
56  
57  
58  
59  
60

252 **References**

- 253 1. Public Health Agency of Canada COVID-19 Surveillance and Epidemiology Team. A  
 254 retrospective analysis of the start of the COVID-19 epidemic in Canada, January 15–  
 255 March 12, 2020. *Canada Commun Dis Rep.* 2020;46(7/8):236–41.
- 256 2. City of Toronto. COVID-19: Status of Cases in Toronto [Internet]. City of Toronto. 2020  
 257 [cited 2020 Nov 28]. Available from: <https://www.toronto.ca/home/covid-19/covid-19-latest-city-of-toronto-news/covid-19-status-of-cases-in-toronto/>
- 259 3. Ontario Agency for Health Protection and Promotion (Public Health Ontario).  
 260 Epidemiological summary: COVID-19 in Ontario - January 15, 2020 to November 26,  
 261 2020 [Internet]. Toronto, ON; 2020. Available from: <https://covid-19.ontario.ca/covid-19-epidemiologic-summaries-public-health-ontario>
- 263 4. Public Health Ontario. Ontario COVID-19 Data Tool [Internet]. 2021 [cited 2021 Mar 19].  
 264 Available from: <https://www.publichealthontario.ca/en/data-and-analysis/infectious-disease/covid-19-data-surveillance/covid-19-data-tool?tab=summary>
- 266 5. Singu S, Acharya A, Challagundla K, Byrareddy SN. Impact of Social Determinants of  
 267 Health on the Emerging COVID-19 Pandemic in the United States. *Front Public Heal.*  
 268 2020;8(July):1–10.
- 269 6. Baker MG. Nonrelocatable Occupations at Increased Risk During Pandemics: United  
 270 States, 2018. *Am J Public Health.* 2020;110(8):1126–32.
- 271 7. Toronto Public Health. External Dashboard Summary and Technical Notes [Internet].  
 272 Toronto, ON; 2020 [cited 2020 Dec 10]. p. 1–4. Available from:  
 273 <https://drive.google.com/file/d/1kq0d6sSLAft2l8BUbnofn1-SrhBPREV6/view>
- 274 8. City of Toronto. Neighbourhood Profiles [Internet]. Open Data Toronto. 2020 [cited 2020  
 275 Nov 28]. Available from: <https://open.toronto.ca/dataset/neighbourhood-profiles/>
- 276 9. City of Toronto. Neighbourhoods [Internet]. Open Data Toronto. 2020 [cited 2020 Nov  
 277 28]. Available from: <https://open.toronto.ca/dataset/neighbourhoods/>
- 278 10. Matheson FI, Moloney G, van Ingen T. 2016 Ontario Marginalization Index [Internet].  
 279 2018. Available from: <https://www12.statcan.gc.ca/census-recensement/2016/dp-pd/prof/details/download->
- 281 11. Berke O. Choropleth mapping of regional count data of *Echinococcus multilocularis*  
 282 among red foxes in Lower Saxony, Germany. *Prev Vet Med.* 2001;52(2):119–31.
- 283 12. Tango T, Takahashi K. A flexibly shaped spatial scan statistic for detecting clusters. *Int J*  
 284 *Health Geogr.* 2005;4(11):1–15.
- 285 13. Aamodt G, Samuelsen SO, Skrondal A. A simulation study of three methods for detecting  
 286 disease clusters. *Int J Health Geogr.* 2006;5:1–11.
- 287 14. Assunção RM, Reis EA. A new proposal to adjust Moran's I for population density. *Stat*  
 288 *Med.* 1999;18(16):2147–62.
- 289 15. Diggle P, Riberio PJ. *Model-based Geostatistics*. Springer; 2007. 79–98 p.
- 290 16. R Core Team. R: A language and environment for statistical computing. [Internet].

- 1  
2  
3 291 Vienna, Austria; 2020. Available from: <https://www.r-project.org/%0A>  
4  
5 292 17. RStudio Team. RStudio: Integrated Development Environment for R. [Internet]. Boston,  
6 293 MA; 2020. Available from: <http://www.rstudio.com/>  
7  
8 294 18. Sy KTL, Martinez ME, Rader B, White LF. Socioeconomic disparities in subway use and  
9 295 COVID-19 outcomes in New York City. *Am J Epidemiol.* 2020;  
10 296 19. Vazquez J, Islam T, Beller J, Fiori K, Correa R, Correa DJ. Expanding Paid Sick Leave as  
11 297 a Public Health Tool in the Covid-19 Pandemic. *J Occup Environ Med.*  
12 298 2020;62(10):e598–9.  
13  
14 299 20. Piper K, Youk A, James AE, Kumar S. Paid sick days and stay-At-home behavior for  
15 300 influenza. *PLoS One.* 2017;12(2):1–13.  
16  
17 301 21. Heymann J, Daku M. Ensuring equitable access to sick leave. *CMAJ.* 2014;186(13):975–  
18 302 6.  
19  
20 303 22. Jordan-Martin NC, Madad S, Alves L, Wang J, O’Gere L, Smith YG, et al. Isolation hotels:  
21 304 A community-based intervention to mitigate the spread of the COVID-19 pandemic. *Heal*  
22 305 *Secur.* 2020;18(5):377–82.  
23  
24 306 23. Cevik M, Baral SD, Crozier A, Cassell JA. Support for self-isolation is critical in covid-19  
25 307 response. *BMJ.* 2021;372(224):1–2.  
26  
27 308  
28  
29  
30  
31  
32  
33  
34  
35  
36  
37  
38  
39  
40  
41  
42  
43  
44  
45  
46  
47  
48  
49  
50  
51  
52  
53  
54  
55  
56  
57  
58  
59  
60

309

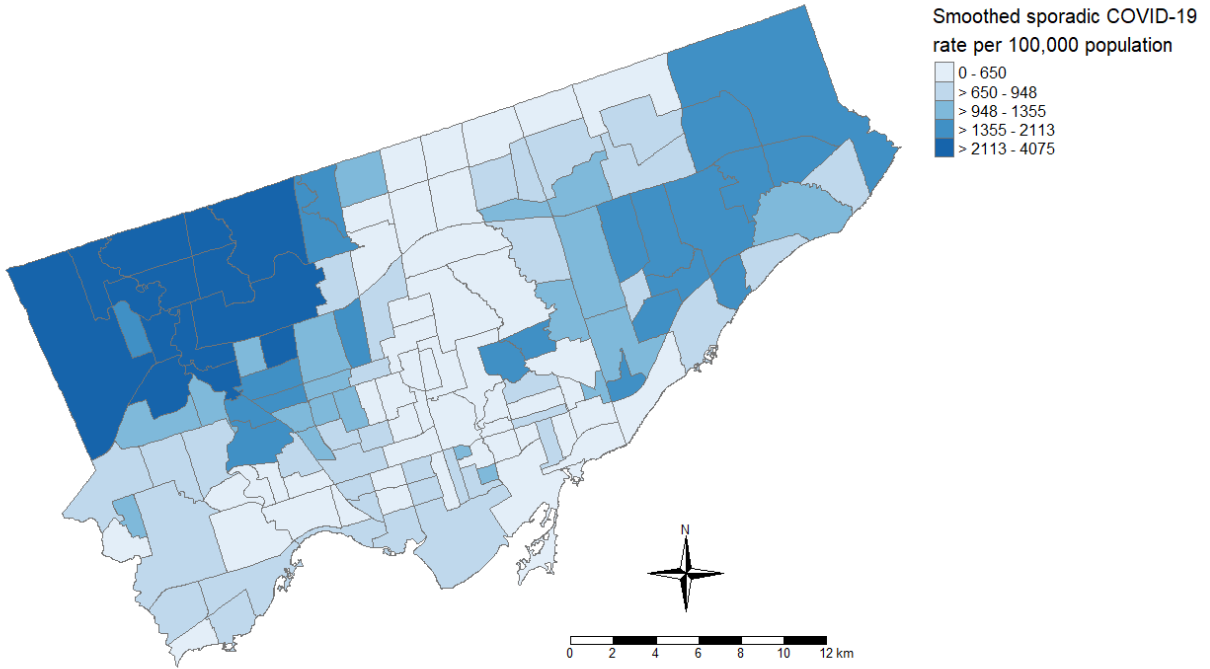

310

311 **Figure 1:** Map of smoothed sporadic COVID-19 cases per 100,000 population in Toronto, Ontario  
 312 neighbourhoods from January 25, 2020 – November 26, 2020.

313

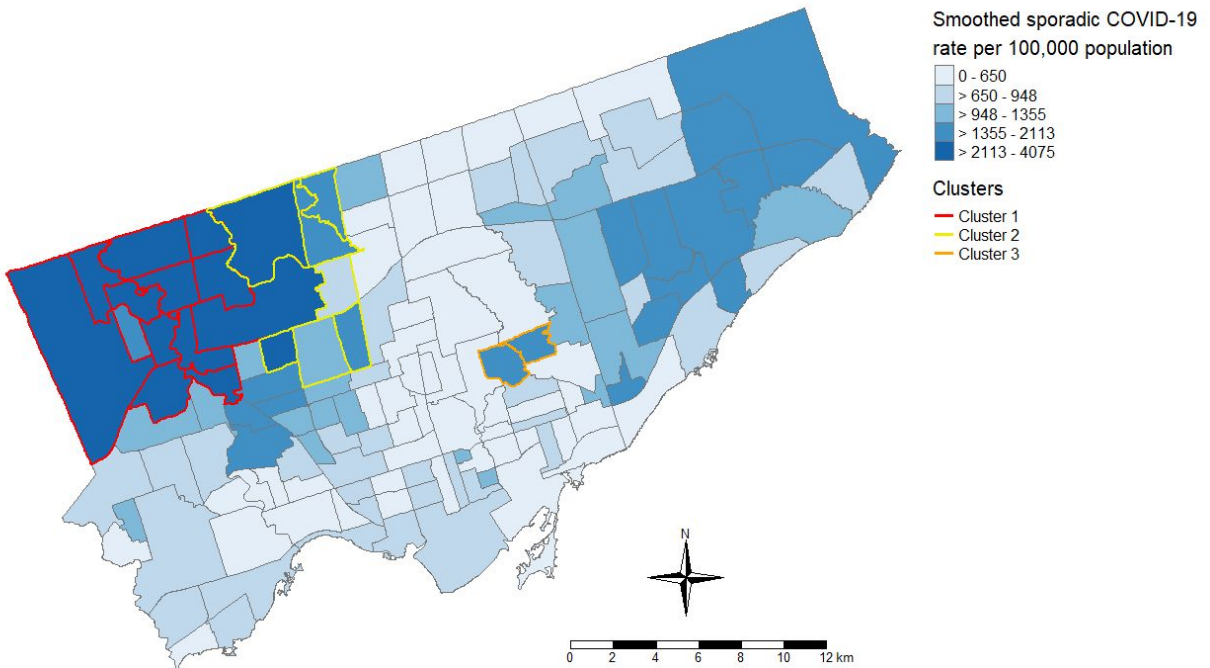

1  
2  
3 314 **Figure 2:** Three identified clusters of elevated sporadic COVID-19 risk in Toronto, ON.  
4  
5

6 315  
7

8  
9 316 **Table 1:** Clusters of increased risk of sporadic COVID-19 in Toronto neighbourhoods.  
10

| Cluster | SMR  | 95% CI    | Cases | Expected | Population | P-value |
|---------|------|-----------|-------|----------|------------|---------|
| 1       | 2.43 | 2.38–2.49 | 6995  | 2873.49  | 262566     | 0.001   |
| 2       | 1.59 | 1.53–1.66 | 2323  | 1461.00  | 133499     | 0.001   |
| 3       | 1.70 | 1.59–1.82 | 802   | 471.04   | 43041      | 0.001   |

21  
22 317  
23

24  
25 318  
26

27 319  
28

29 320  
30

31 321  
32

32 322 **Table 2:** Summary of generalized linear geostatistical model of sporadic COVID-19 cases in  
33 Toronto, ON at the neighbourhood-level.  
34

| Variable               | Parameter estimate | Standard Error | Relative risk (95% CI)   | P-value |
|------------------------|--------------------|----------------|--------------------------|---------|
| Intercept              | -7.281             | 0.2493         | 0.0007 (0.0004 – 0.0011) | < 0.01  |
| Average household size | 0.772              | 0.0951         | 2.17 (1.80–2.61)         | < 0.01  |
| LIM-AT                 | 0.032              | 0.0048         | 1.03 (1.02–1.04)         | < 0.01  |
| Range                  | 0.591              | –              | –                        | –       |

35  
36  
37  
38  
39  
40  
41  
42  
43  
44  
45  
46 324  
47  
48  
49  
50  
51  
52  
53  
54  
55  
56  
57  
58  
59  
60



1  
2  
3 **Appendix**  
4  
5  
6

7 Table A1: Summary statistics of Toronto neighbourhood characteristics.  
8

|                                        | Median | Range         |
|----------------------------------------|--------|---------------|
| Case Count                             | 137    | 27–1115       |
| Population                             | 16750  | 6577–65913    |
| Raw Rate per 100,000                   | 819    | 255–3384      |
| Smoothed Rate per 10,000               | 824    | 264–3368      |
| Average Household Size                 | 2.525  | 1.540–3.44    |
| LIM-AT                                 | 18.55  | 4.50–45.50    |
| Dependency Ratio                       | 0.4683 | 0.1291–0.6980 |
| Population density per km <sup>2</sup> | 5072   | 1040–44321    |

9  
10  
11  
12  
13  
14  
15  
16  
17  
18  
19  
20  
21  
22  
23  
24  
25  
26  
27  
28  
29  
30  
31  
32  
33  
34  
35  
36  
37  
38  
39  
40  
41  
42  
43  
44  
45  
46  
47  
48  
49  
50  
51  
52  
53  
54  
55  
56  
57  
58  
59  
60

Confidential
